# Supplementary material for: Angiogenic activity mediates bone repair from human pluripotent stem cell-derived osteogenic cells
Source: PubMed Central journal article supplement (PMC4793227; doi:10.1038/srep22868), 2016-03-16
Supplement: srep22868-s1.pdf [file srep22868-s1.pdf]

**Angiogenic activity mediates bone repair from human pluripotent stem cell-derived osteogenic cells**

Li Zou<sup>1</sup>, Qingshan Chen<sup>2</sup>, Zachary Quanbeck<sup>2</sup>, Joan E. Bechtold<sup>2</sup>, \*Dan S. Kaufman<sup>1</sup>

<sup>1</sup>Department of Medicine, University of Minnesota, Minneapolis, MN 55455, USA

<sup>2</sup>Excelen Center for Bone & Joint Research and Education, Minneapolis, MN, 55415, USA

\*Corresponding author:

Dr. Dan S. Kaufman

Division of Hematology, Oncology and Transplantation

420 Delaware Street SE, MMC 480

Minneapolis, MN 55455

Office: 612-624-0922

Email: [kaufm020@umn.edu](mailto:kaufm020@umn.edu)

## **Supplemental Results:**

### **--- Supplemental Figure Legends:**

**Supplemental Figure 1. Pluripotency of undifferentiated hESCs and hiPSCs.** (a) Flow cytometric analysis of pluripotency markers, SSEA4 and Tra-160, on hESCs, UCBiPSC and PBiPSCs, with BM-MSCs as control. (b) Flow cytometric analysis of hematoendothelial markers, CD31 and CD34, on hESCs, UCBiPSC and PBiPSCs. (c) Immunostaining of Nanog, SOX2, Oct4 and Tra-1-81 in the cells (scale bar: 200  $\mu\text{m}$ ). (d) RT-PCR results to show pluripotency marker genes in hESCs, UCBiPSCs and PBiPSCs, with BM-MSCs as control. Representative results out of 3 independent experiments were shown here.

**Supplemental Figure 2. qRT-PCR analysis of Osteonectin (*SPARC*) in differentiated hESCs and hiPSCs at different passages.** The gene expression level was normalized by undifferentiated cells for each cell line, n= 3 independent experiments.

**Supplemental Figure 3. Cell morphology of osteogenic differentiated cells at p6.** The bright field images showed that the differentiated cells, derived from BM-MSCs, hESCs, UCBiPSCs or PBiPSCs, are quite similar in their morphology, spreading out to form flat cells and adhere to the substrate (scale bar: 100  $\mu\text{m}$ ).

**Supplemental Figure 4. Phenotypic analysis of osteogenic differentiated cells.** (a) Flow cytometric analysis of surface markers on the differentiated BM-MSC-OS, hESC-OS, UCBiPSC-OS and PBiPSC-OS cells at passage 6, a representative result from 4 independent experiments. (b) AdipoRed staining of adipogenic droplet in BM-MSC, BM-MSC-OS, hESC-OS, UCBiPSC-OS and PBiPSC-OS cultured in adipogenic medium for 3 weeks, representative images from 3 independent experiments (scale bar: 100  $\mu\text{m}$ ).

**Supplemental Figure 5. Rat femur fracture repaired by implanted cells.** (a) X-ray images of healing rat femurs repaired by different cells at 4-, 8- and 10-weeks, one representative image out of 12 for each group. (b) 3D reconstruction of microCT images from healing femurs repaired by different cells at 10-weeks.

## Supplemental Figures:

### Supplemental Figure-1

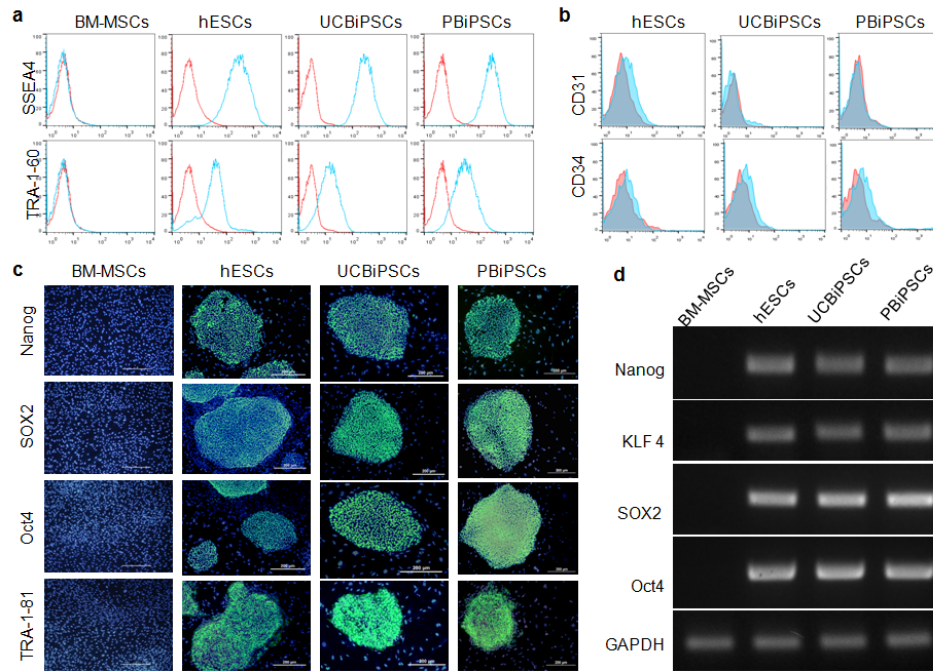

**Supplemental Figure 1. Pluripotency of undifferentiated hESCs and hiPSCs.** (a) Flow cytometric analysis of pluripotency markers, SSEA4 and Tra-160, on hESCs, UCBiPSC and PBiPSCs, with BM-MSCs as control. (b) Flow cytometric analysis of hematoendothelial markers, CD31 and CD34, on hESCs, UCBiPSC and PBiPSCs. (c) Immunostaining of Nanog, SOX2, Oct4 and Tra-1-81 in the cells (scale bar: 200  $\mu$ m). (d) RT-PCR results to show pluripotency marker genes in hESCs, UCBiPSCs and PBiPSCs, with BM-MSCs as control. Representative results out of 3 independent experiments were shown here.

Supplemental Figure-2

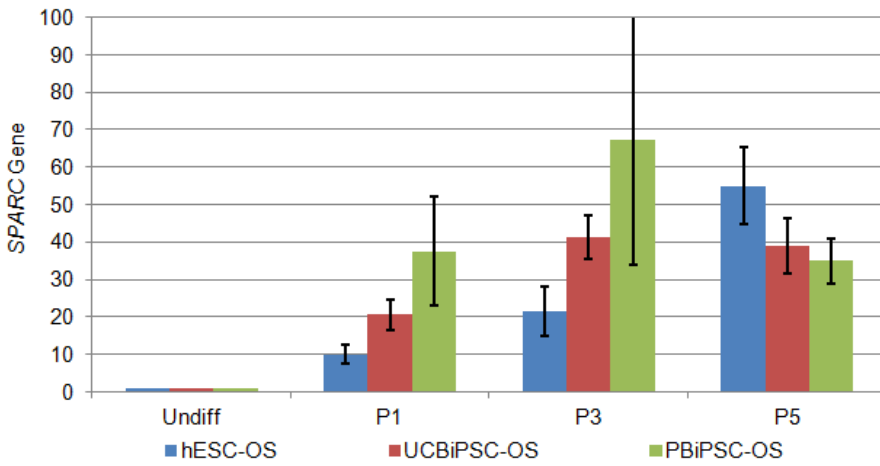

**Supplemental Figure 2. qRT-PCR analysis of Osteonectin (*SPARC*) in differentiated hESCs and hiPSCs at different passages.** The gene expression level was normalized by undifferentiated cells for each cell line, n= 3 independent experiments.

Supplemental Figure-3

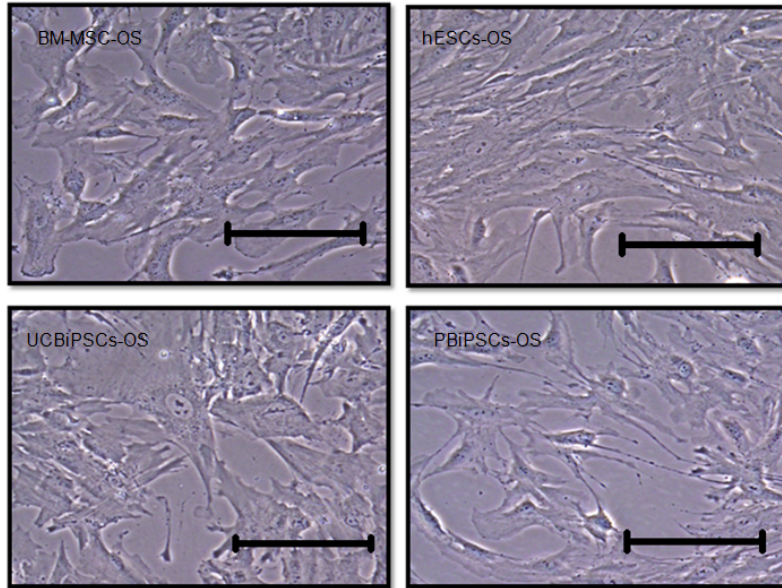

**Supplemental Figure 3. Cell morphology of osteogenic differentiated cells at p6.** The bright field images showed that the differentiated cells, derived from BM-MSCs, hESCs, UCBiPSCs or PBiPSCs, are quite similar in their morphology, spreading out to form flat cells and adhere to the substrate (scale bar: 100  $\mu\text{m}$ ).

Supplemental Figure-4

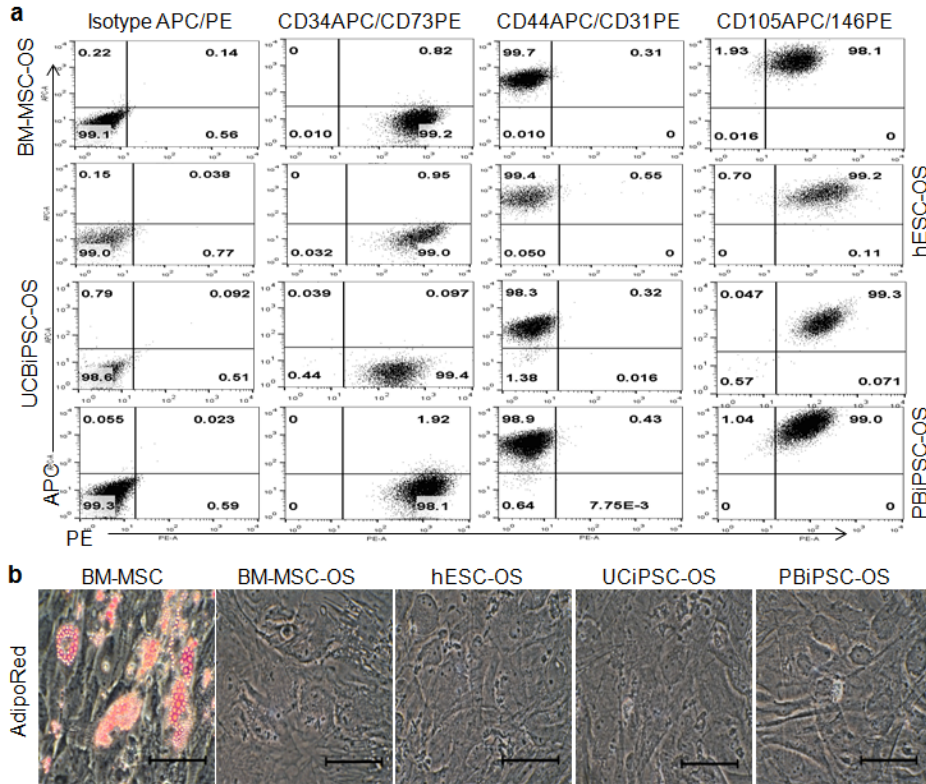

**Supplemental Figure 4. Phenotypic analysis of osteogenic differentiated cells.** (a) Flow cytometric analysis of surface markers on the differentiated BM-MSC-OS, hESC-OS, UCBiPSC-OS and PBiPSC-OS cells at passage 6, a representative result from 4 independent experiments. (b) AdipoRed staining of adipogenic droplet in BM-MSC, BM-MSC-OS, hESC-OS, UCiPSC-OS and PBiPSC-OS cultured in adipogenic medium for 3 weeks, representative images from 3 independent experiments (scale bar: 100  $\mu$ m).

Supplemental Figure-5

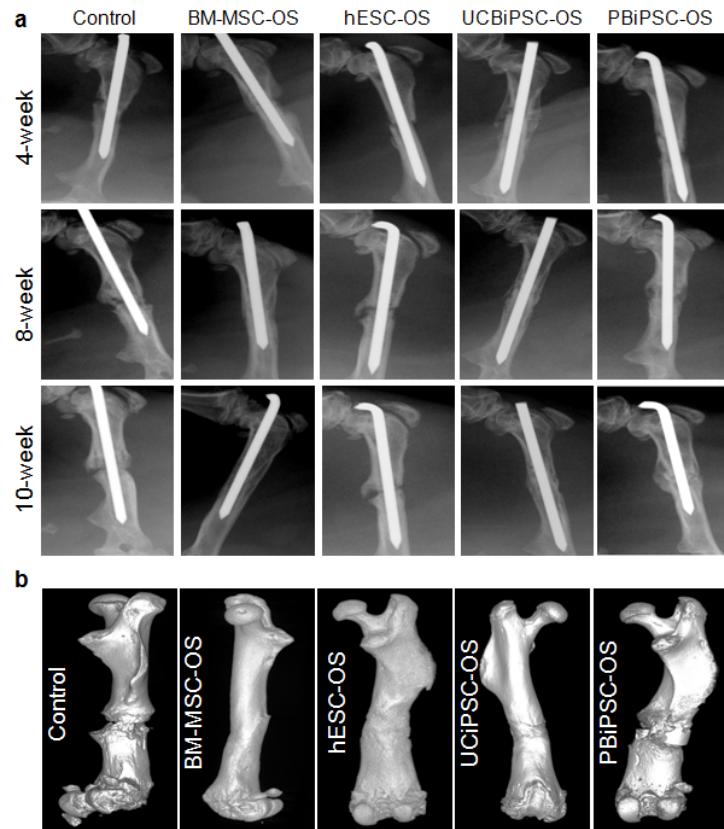

**Supplemental Figure 5. Rat femur fracture repaired by implanted cells. (a)** X-ray images of healing rat femurs repaired by different cells at 4-, 8- and 10-weeks, one representative image out of 12 for each group. **(b)** 3D reconstruction of microCT images from healing femurs repaired by different cells at 10-weeks.
